# Supplementary material for: Immune Dysfunction in Rett Syndrome Patients Revealed by High Levels of Serum Anti-N(Glc) IgM Antibody Fraction
Source: Hindawi journal article supplement (doi:10.1155/2014/260973), 2014-01-01
Supplement: f1 [file 260973.f1.pdf]

## Supporting Information

### Immune dysfunction in Rett syndrome patients revealed by high levels of serum anti-N(Glc) IgM antibody fraction

Papini et al.

The CSF114(Glc) antigen failed to detect a significant IgG serum antibody population in both patient groups and healthy controls, the majority of the IgG titers being close to the detection limit (Supplementary Figure 1).

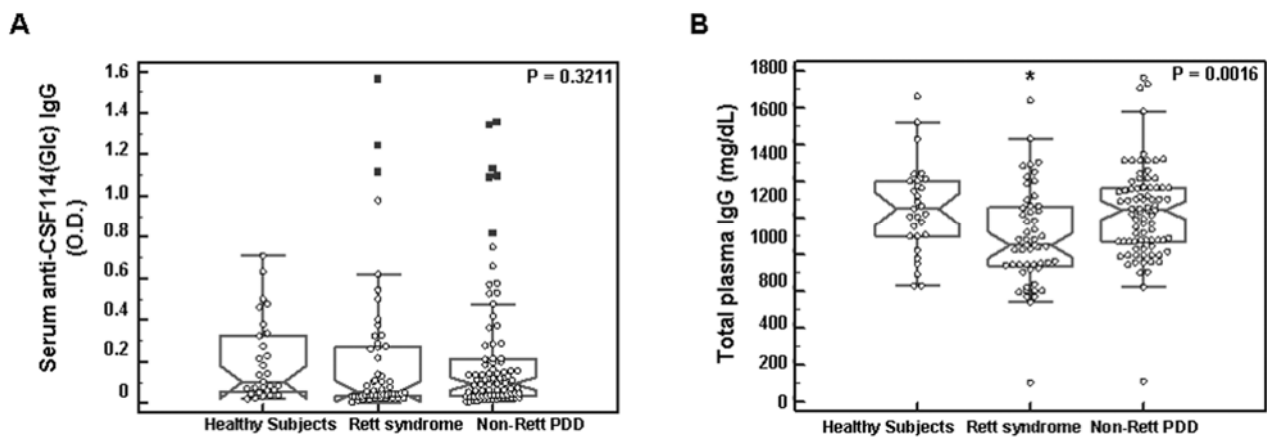

**Supplementary Figure 1. Decreased total IgG along with comparable IgG autoantibodies anti-CSF114(Glc) titers in Rett syndrome.** (a) Anti-CSF114(Glc) serum IgG antibody titers by the N-glucopeptide-based immunoenzymatic assay. (b) Total plasma IgG levels detected by the conventional agglutination assay (Roche Cobas 6000). Data are plotted as notched box dot plots with medians and inter-quartile range values. P values refer to non-parametric Kruskal-Wallis analysis of variance. Solid rectangles indicate outlier values. \*  $P < 0.05$ .
